# Supplementary material
Source: Springer Nature journal article supplement (https://www.springermedizin.de/resource/supplementary/12885_2012_5265_MOESM2_ESM.pdf/9465442)

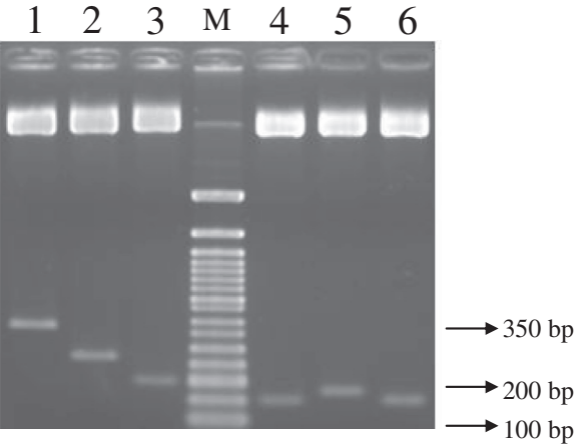

Supplement: MOESM2 [file 9465442]
